# Madelung's Disease and Airway Management

Ángel Becerra-Bolaños, M.D., Lucía Valencia, Ph.D., Leonardo Cabrera-Ramírez, M.D., Aurelio Rodríguez-Pérez, Ph.D.

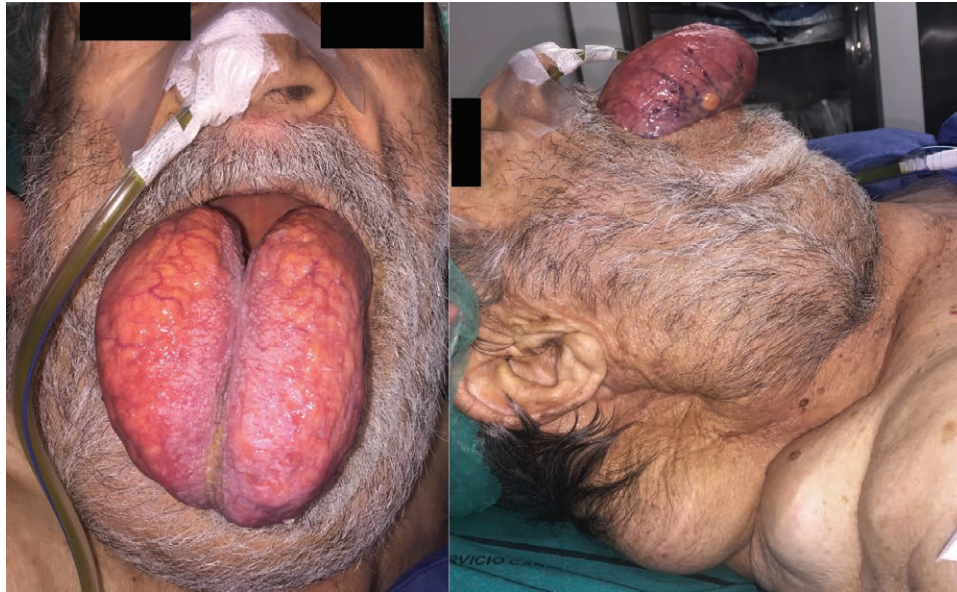

Madelung's disease, also known as benign symmetrical lipomatosis, familial symmetric lipomatosis, or Launois-Bensaude syndrome, is a rare disorder characterized by the presence of multiple, symmetrical, and nonencapsulated lipomas located in the neck, face, and upper trunk.<sup>1</sup> These fat masses cause significant deformity and cervical immobility. Airway management of these patients is challenging, and postoperative respiratory failure is a frequent complication.

The accompanying images show the preoperative physical examination of a man suffering from Madelung's disease who required urgent surgery for intestinal obstruction. The images reveal a significant macroglossia occluding the airway (Mallampati IV), as well as inability to mandibular protrusion and limitation of cervical mobility by a giant posterior cervical lipoma. As observed, the presence of anterior cervical lipomas makes it impossible to evaluate thyromental distance and tracheal orientation.

Macroglossia is very rare in patients suffering from Madelung's disease.<sup>1</sup> Its presence makes airway management an even greater challenge for anesthesiologists. The predictors of difficult airway in this patient make awake fiberoptic endotracheal intubation mandatory. Because of the presence of macroglossia and cervical lipomas that may compress the airway, sedation to facilitate fiberoptic endotracheal intubation must be carried out with caution to avoid oversedation and potential hypoventilation and hypoxia. Awake videolaryngoscopy could offer another

option in the airway management of patients suffering from Madelung's disease.<sup>2,3</sup> Nevertheless, the presence of macroglossia in these patients could make videolaryngoscopy even more complicated and, therefore, lead to a failure of airway management.

## Competing Interests

The authors declare no competing interests.

## Correspondence

Address correspondence to Dr. Becerra-Bolaños: [angbecbol@gmail.com](mailto:angbecbol@gmail.com)

## References

1. Mayo Yáñez M, González Poggioli N, Álvarez-Buylla Blanco M, Herranz González-Botas J: Benign symmetric lipomatosis with lingual involvement: Case report and literature review. *J Stomatol Oral Maxillofac Surg* 2018; 119:148–50
2. Stopar-Pintaric T, Markova L, Tomazevic M, Hodzovic I: An awake videolaryngoscope-assisted intubation in a patient with Madelung disease and a critical airway obstruction. *Minerva Anesthesiol* 2017; 83:660–2
3. Torres M, Rodríguez J, Salvatierra B, Gilsanz F: [Airway management with the Airtraq in a patient with Launois-Bensaude syndrome]. *Rev Esp Anesthesiol Reanim* 2009; 56:579–81

From the Department of Anesthesiology and Critical Care Medicine, Hospital Universitario de Gran Canaria Doctor Negrín, Las Palmas de Gran Canaria, Spain.

Copyright © 2018, the American Society of Anesthesiologists, Inc. Wolters Kluwer Health, Inc. All Rights Reserved. *Anesthesiology* 2019; 130:313
